# Supplementary material
Source: PubMed Central journal article supplement (PMC3396759)
Supplement: NIHMS360599-supplement-1.pdf [file NIHMS360599-supplement-1.pdf]

Supplemental information for

IL-6 TRIGGERS IL-21 PRODUCTION BY HUMAN CD4<sup>+</sup> T CELLS  
TO DRIVE STAT3-DEPENDENT PLASMA CELL DIFFERENTIATION IN B CELLS

Sean A. Diehl<sup>1,2,#</sup>, Heike Schmidlin<sup>2</sup>, Maho Nagasawa<sup>2</sup>,  
Bianca Blom<sup>2</sup>, and Hergen Spits<sup>2,3,4</sup>

<sup>1</sup>Department of Medicine-Immunobiology, University of Vermont, Burlington, VT, 05405, USA

<sup>2</sup>Department of Cell Biology and Histology, Academic Medical Center of the University of Amsterdam (AMC-UvA), Center for Immunology Amsterdam (CIA), 1105AZ, Amsterdam, The Netherlands

<sup>3</sup>AIMM Therapeutics, 1105BA, Amsterdam, The Netherlands

<sup>4</sup>Tytgat Institute for Liver and Intestinal Research, Academic Medical Center of the University of Amsterdam (AMC-UvA), 1105BK, Amsterdam, The Netherlands

#Address correspondence to:

Dr. Sean A. Diehl  
Immunobiology Program  
D-305 Given Medical Building  
University of Vermont  
Burlington, VT 05405  
Phone: (802) 656-0749  
Fax: (802) 656-3854  
sean.diehl@uvm.edu

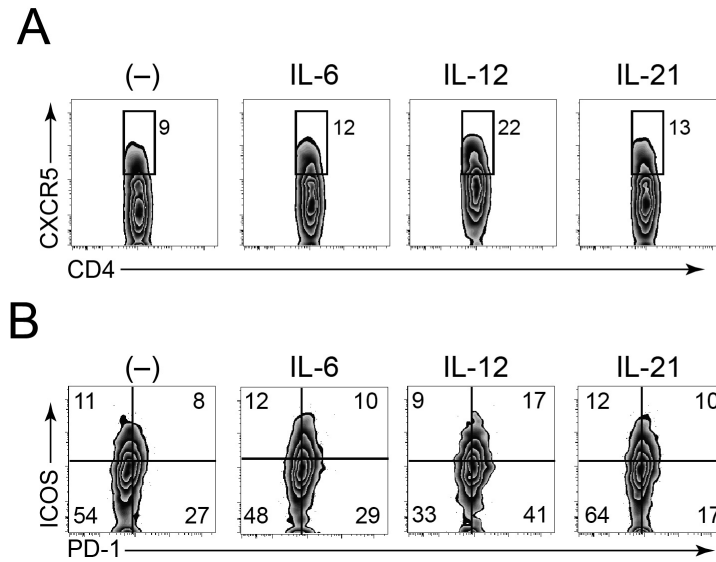

**Figure S1: Representative surface phenotype plots for data presented in Fig 4. (A)** CXCR5 expression on CD4<sup>+</sup>CD3<sup>+</sup> T cells following *in vitro* stimulation with anti-CD3/CD28 in the presence or absence (-) of the indicated cytokines. **(B)** ICOS and PD-1 expression on CXCR5<sup>+</sup>CD4<sup>+</sup> T cells. Gates were determined based on isotype control staining.

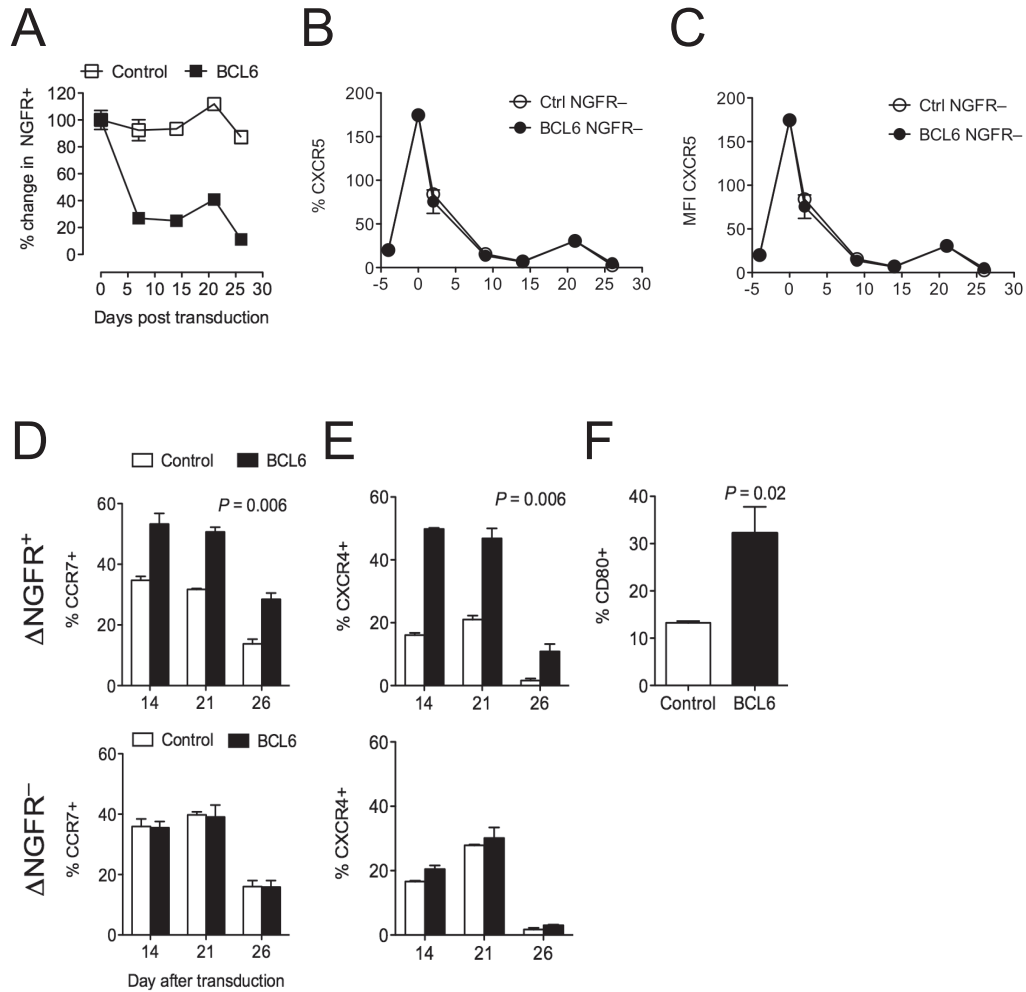

**Figure S2: BCL6 overexpression in primary human CD4<sup>+</sup> T cells.**

Total CD4<sup>+</sup> T cells from peripheral blood were transduced with retroviral vectors encoding either LZRS-IRES- $\Delta$ NGFR (Control, open symbols) or LZRS-BCL6-IRES- $\Delta$ NGFR (BCL6, closed symbols). Transduced cells were cultured on irradiated allogeneic PBMC feeders with PHA (2  $\mu$ g/ml) and IL-2 (20 U/ml) (methods). **(A)** Frequency of NGFR<sup>+</sup> cells over time relative to initial transduction efficiency as determined by flow cytometry. Gated on CD4<sup>+</sup>NGFR<sup>-</sup> cells, **(B)** Percent CXCR5<sup>+</sup> cells and **(C)** CXCR5 surface mean fluorescence intensity (MFI) were determined. Quantitation of **(D)** CCR7 and **(E)** CXCR4 expression on from CD4<sup>+</sup>NGFR<sup>+</sup> (upper panels) CD4<sup>+</sup>NGFR<sup>-</sup> gated cells (lower panels). See Figure 6 for representative FACS plots. **(F)** Quantitation of CD80 expression in CD4<sup>+</sup>NGFR<sup>+</sup> cells at day 21 after

transduction. Results are means  $\pm$  SD of two independent experiments each containing two donors. Two-way ANOVA was used to calculate *P*-values for data in panels D, E and student's t-test for data in panel F.
